# Supplementary material for: Chiral Birch reduced tertiary phosphines: precursors to asymmetric 1,2-cyclohexenebis(tertiary phosphines)
Source: Royal Society of Chemistry journal article supplement (doi:10.1039/c0dt00648c), 2010-01-01
Supplement: c0dt00648c.pdf [file c0dt00648c.pdf]

## Supplementary Material

*Preparation of (±)-PCy\*PhR (where R = Pr<sup>i</sup>):* Ammonia (400 cm<sup>3</sup>) was condensed onto PPh<sub>3</sub> (20.0 g, 0.0763 mol). Sodium foil (3.80 g, 0.169 mol) was added piecewise to the stirred solution. The reaction was allowed to stir in the cold for 0.5 h, 2-bromopropane (18.82 g, 0.153 mol) was added dropwise followed by the further addition of sodium foil (3.90 g, 0.169 mol). The reaction mixture was stirred for a further 2 h. Solid ammonium chloride was added until the colour discharged and the reaction mixture stirred overnight under nitrogen to allow the ammonia to evaporate. Water (150 cm<sup>3</sup>) and dichloromethane (50 cm<sup>3</sup>) were added to the residue. The resulting phases were separated and the aqueous phase extracted further with dichloromethane (2 x 25 cm<sup>3</sup>). The combined organic extracts were dried (MgSO<sub>4</sub>), filtered and the solvent removed *in vacuo*. Distillation of the crude oil under reduced pressure gave two fractions: **Fraction I**, (±)-P<sup>i</sup>Pr<sup>i</sup>Ph (4.97 g, 43%), b.p.65-80 °C, 0.05 mm Hg. <sup>1</sup>H NMR (CDCl<sub>3</sub>): δ 1.10 (dd, 3 H, <sup>3</sup>J<sub>HH</sub> = 6.9 Hz, <sup>3</sup>J<sub>PH</sub> = 15.6 Hz, *CMe*), 1.11 (dd, 3 H, <sup>3</sup>J<sub>HH</sub> = 6.9 Hz, <sup>3</sup>J<sub>PH</sub> = 15.6 Hz, *CMe*), 2.11 (m, 1 H, <sup>3</sup>J<sub>HH</sub> = 6.9 Hz, <sup>2</sup>J<sub>PH</sub> = 6.9 Hz, *CHMe*<sub>2</sub>), 4.05 (bs, 1 H, *PH*), 7.31–7.68 (m, 5 H, aromatics). <sup>31</sup>P{<sup>1</sup>H} NMR (CDCl<sub>3</sub>): δ -24.3 (s, 1 P). <sup>1</sup>H NMR (C<sub>6</sub>D<sub>6</sub>): δ 0.96 (dd, 3 H, <sup>3</sup>J<sub>HH</sub> = 6.9 Hz, <sup>3</sup>J<sub>PH</sub> = 15.6 Hz, *CMe*), 0.99 (dd, 3 H, <sup>3</sup>J<sub>HH</sub> = 6.9 Hz, <sup>3</sup>J<sub>PH</sub> = 15.6 Hz, *CMe*), 1.89 (m, 1 H, <sup>3</sup>J<sub>HH</sub> = 6.9 Hz, <sup>2</sup>J<sub>PH</sub> = 6.9 Hz, *CHMe*<sub>2</sub>), 3.99 (dd, 1 H, <sup>3</sup>J<sub>HH</sub> = 6.9 Hz, <sup>1</sup>J<sub>PH</sub> = 175 Hz, *PH*), 7.07–7.45 (m, 5 H, aromatics). <sup>31</sup>P{<sup>1</sup>H} NMR (C<sub>6</sub>D<sub>6</sub>): δ -25.2 (s, 1 P). LR-EI MS: *m/z* 152 (M)<sup>+</sup>, 110 (M - C<sub>3</sub>H<sub>6</sub>)<sup>+</sup>, 109 (M - Pr<sup>i</sup>)<sup>+</sup>, 108 (M - C<sub>3</sub>H<sub>8</sub>)<sup>+</sup>. **Fraction II**, (±)-PCy\*Pr<sup>i</sup>Ph (9.27 g, 53%), b.p.120-122 °C, 0.05 mm Hg. <sup>1</sup>H NMR (CDCl<sub>3</sub>): δ 0.99 (dd, 6 H, <sup>3</sup>J<sub>HH</sub> = 6.9 Hz, <sup>3</sup>J<sub>PH</sub> = 14.4 Hz, *CMe*), 1.20 (dd, 6 H, <sup>3</sup>J<sub>HH</sub> = 6.9 Hz, <sup>3</sup>J<sub>PH</sub> = 14.4 Hz, *CMe*), 1.87 (m, 1 H, <sup>3</sup>J<sub>HH</sub> = 6.9 Hz, <sup>2</sup>J<sub>PH</sub> = 6.9 Hz, *CHMe*<sub>2</sub>), 2.39 (m, 2 H, Cy\*-*H*<sub>4a</sub>/*H*<sub>4b</sub>), 3.31 (m, 1 H, Cy\*-*H*<sub>1</sub>), 5.58 (m, 1 H, Cy\*-*H*<sub>2/6</sub>), 5.61 (m, 1 H, Cy\*-*H*<sub>2/6</sub>), 5.70 (m, 2 H, Cy\*-*H*<sub>3</sub>, *H*<sub>5</sub>), 7.26–7.50 (m, 5 H, aromatics). <sup>31</sup>P{<sup>1</sup>H} NMR (CDCl<sub>3</sub>): δ 8.8 (s, 1 P). <sup>13</sup>C{<sup>1</sup>H} NMR (CDCl<sub>3</sub>): δ 18.1 (d, 1 C, <sup>2</sup>J<sub>PC</sub> = 18.2 Hz, *CMe*), 18.6 (d, 1 C, <sup>2</sup>J<sub>PC</sub> = 15.4 Hz, *CMe*), 19.9 (d, 1 C, <sup>2</sup>J<sub>PC</sub> = 12.5 Hz, Cy\*-*C*<sub>4</sub>), 24.9 (d, 1 C, <sup>1</sup>J<sub>PC</sub> = 3.5 Hz, *CHMe*<sub>2</sub>), 34.4 (d, 1 C, <sup>1</sup>J<sub>PC</sub> = 15.5 Hz, Cy\*-*C*<sub>1</sub>), 122.9 (s, 1 C, Cy\*-*C*<sub>3/5</sub>), 123.6 (d, 1 C, <sup>3</sup>J<sub>PC</sub> = 6.8 Hz, Cy\*-*C*<sub>3/5</sub>), 124.4 (d, 1 C, <sup>2</sup>J<sub>PC</sub> = 7.9 Hz, Cy\*-*C*<sub>2/6</sub>), 124.6 (d, 1 C, <sup>2</sup>J<sub>PC</sub> = 10.6 Hz, Cy\*-*C*<sub>2/6</sub>), 126.2 (s, 1 C, aromatic-*C*<sub>3/5</sub>), 126.3 (s, 1 C, aromatic-*C*<sub>3/5</sub>), 127.6 (s, 1 C, aromatic-*C*<sub>4</sub>), 133.3 (s, 1 C, aromatic-*C*<sub>2/6</sub>), 133.5 (s, 1 C, aromatic-*C*<sub>2/6</sub>). LR-EI MS: *m/z* 230 (M)<sup>+</sup>, 201 (M - Et)<sup>+</sup>, 185 (M - Et - CH<sub>4</sub>)<sup>+</sup>, 152 (M - C<sub>6</sub>H<sub>6</sub>)<sup>+</sup>. HR-EI MS: Found for (M)<sup>+</sup> 230.1231 (calc. for C<sub>15</sub>H<sub>19</sub>P: 230.1224).

*Preparation of (±)-PCy\*PhR (where R = Bu<sup>s</sup>):* Ammonia (400 cm<sup>3</sup>) was condensed onto PPh<sub>3</sub> (20.0 g, 0.0763 mol). Sodium foil (3.96 g, 0.172 mol) was added piecewise to the stirred solution. The reaction was allowed to stir in the cold for 0.5 h, 2-bromobutane (20.90 g, 0.153 mol) was added dropwise followed by the further addition of sodium foil (3.94 g, 0.171 mol). The reaction mixture was stirred for a further 2 h. Solid ammonium chloride was added until the colour discharged and the reaction mixture stirred overnight under nitrogen to allow the ammonia to evaporate. Water (150 cm<sup>3</sup>) and dichloromethane (50 cm<sup>3</sup>) were added to the residue. The resulting phases were separated and the aqueous phase extracted further with dichloromethane (2 x 25 cm<sup>3</sup>). The combined organic extracts were dried (MgSO<sub>4</sub>),

filtered and the solvent removed *in vacuo*. Distillation of the crude oil under reduced pressure gave two fractions: **Fraction I**, (*R<sub>P</sub>*<sup>\*</sup>,*R<sub>P</sub>*<sup>\*</sup>)- & (*R<sub>P</sub>*<sup>\*</sup>,*S<sub>P</sub>*<sup>\*</sup>)-PHBu<sup>s</sup>Ph (1.30 g, 10%), b.p.89-100 °C, 0.05 mm Hg. <sup>1</sup>H NMR (CDCl<sub>3</sub>): δ 0.99 (t, 3 H, <sup>3</sup>J<sub>HH</sub> = 7.2 Hz, CH<sub>2</sub>CMe), 1.09 (dd, 3 H, <sup>3</sup>J<sub>HH</sub> = 7.2 Hz, <sup>3</sup>J<sub>PH</sub> = 13.5 Hz, CHCMe), 1.37 (m, 1 H, CHH), 1.56 (m, 1 H, CHH), 1.91 (m, 1 H, CHCMe), 4.05 (bd, 1 H, <sup>1</sup>J<sub>PH</sub> = 203 Hz, PH), 7.32–7.56 (m, 5 H, aromatics). <sup>31</sup>P{<sup>1</sup>H} NMR (CDCl<sub>3</sub>): δ -32.6 (s, 1 P), -28.5 (s, 1 P). LR-EI MS: *m/z* 166 (M)<sup>+</sup>, 110 (M – C<sub>4</sub>H<sub>8</sub>)<sup>+</sup>. **Fraction II**, (*R<sub>P</sub>*<sup>\*</sup>,*R<sub>P</sub>*<sup>\*</sup>)- & (*R<sub>P</sub>*<sup>\*</sup>,*S<sub>P</sub>*<sup>\*</sup>)-PCy<sup>\*</sup>Bu<sup>s</sup>Ph (11.98g, 64%), b.p.120-140 °C, 0.05 mm Hg. <sup>1</sup>H NMR (CDCl<sub>3</sub>): δ 0.92 (t, 3 H, <sup>3</sup>J<sub>HH</sub> = 7.5 Hz, CH<sub>2</sub>CMe), 0.95 (t, 3 H, <sup>3</sup>J<sub>HH</sub> = 6.9 Hz, CH<sub>2</sub>CMe), 1.04 (dd, 3 H, <sup>3</sup>J<sub>HH</sub> = 7.2 Hz, <sup>3</sup>J<sub>PH</sub> = 14.7 Hz, CHCMe), 1.19 (dd, 3 H, <sup>3</sup>J<sub>HH</sub> = 6.6 Hz, <sup>3</sup>J<sub>PH</sub> = 14.7 Hz, CHCMe), 1.37 (m, 2 H, CHH), 1.71 (m, 2 H, CHH), 1.94 (m, 2 H, CHCMe), 2.21 (m, 2 H, Cy<sup>\*</sup>-H<sub>4b</sub>), 2.39 (m, 2 H, Cy<sup>\*</sup>-H<sub>4a</sub>), 3.31 (m, 1 H, Cy<sup>\*</sup>-H<sub>1</sub>), 3.38 (m, 1 H, Cy<sup>\*</sup>-H<sub>1</sub>), 5.60 (m, 4 H, Cy<sup>\*</sup>-H<sub>2/6</sub>), 5.69 (m, 4 H, Cy<sup>\*</sup>-H<sub>3</sub>, H<sub>5</sub>), 7.25–7.51 (m, 10 H, aromatics). <sup>31</sup>P{<sup>1</sup>H} NMR (CDCl<sub>3</sub>): δ 4.9 (s, 1 P), 5.6 (s, 1 P). LR-EI MS: *m/z* 244 (M)<sup>+</sup>, 242 (M – H<sub>2</sub>)<sup>+</sup>, 186 (M – C<sub>4</sub>H<sub>10</sub>)<sup>+</sup>.

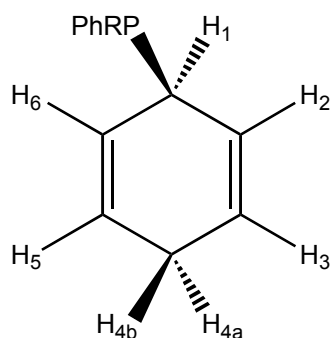

*Preparation of (±)-1,2-C<sub>6</sub>H<sub>8</sub>(PPh<sub>2</sub>){PPh(3-pentyl)}*: The Birch reduced tertiary phosphine (±)-PCy<sup>\*</sup>(3-pentyl)Ph (2.43g, 9.4 mmol) and PPh<sub>2</sub> (1.79g, 9.6 mmol) were stirred in thf (50 cm<sup>3</sup>). KOBu<sup>t</sup> was added and the resulting yellow solution heated under reflux. More KOBu<sup>t</sup> was added after 72 h and the solution heated under reflux for a further 4 days. Saturated aqueous NH<sub>4</sub>Cl (3 drops) was added and the solvent was removed. Dichloromethane (50 cm<sup>3</sup>) and water (20 cm<sup>3</sup>) were added to the residue. The resulting phases were separated and the aqueous phase extracted further with dichloromethane (2 x 10 cm<sup>3</sup>). The combined organic extracts were dried (MgSO<sub>4</sub>), filtered and the solvent removed *in vacuo*. Vacuum distillation was employed to remove unreacted PPh<sub>2</sub> and leave the product as a viscous yellow oil (3.75g, 90%). <sup>1</sup>H NMR (CDCl<sub>3</sub>): δ 0.98 (t, 3 H, <sup>3</sup>J<sub>HH</sub> = 7.5 Hz, CMe), 1.12 (t, 3 H, <sup>3</sup>J<sub>HH</sub> = 7.5 Hz, CMe), 1.51 (m, 4 H, 2 CH<sub>2</sub>-Cy), 1.75 (m, 2 H, CH<sub>2</sub>Me), 1.85 (m, 2 H, CH<sub>2</sub>Me), 2.35 (m, 1 H, CHEt<sub>2</sub>), 3.76 (m, 4 H, 2 CH<sub>2</sub>C=C), 7.28–7.52 (m, 15 H, aromatics). <sup>31</sup>P{<sup>1</sup>H} NMR (CDCl<sub>3</sub>): δ -15.6, -8.8 (ABq, 2 P, <sup>4</sup>J<sub>PP</sub> = 216 Hz). LR-EI MS: *m/z* 444 (M)<sup>+</sup>, 373 (M – Pe)<sup>+</sup>, 265 (M – PPePh)<sup>+</sup>. HR-EI MS: Found for (M)<sup>+</sup> 444.2130 (calc. for C<sub>29</sub>H<sub>34</sub>P<sub>2</sub>: 444.2136).
